# Supplementary material for: Explainable multi-task learning improves the parallel estimation of polygenic risk scores for many diseases through shared genetic basis
Source: PubMed Central journal article supplement (PMC10328362; doi:10.1371/journal.pcbi.1011211), 2023-07-07
Supplement: pcbi.1011211.s003.pdf [file pcbi.1011211.s003.pdf]

## S1 Proof

MTL LINA computes a  $d \times 1$  output vector,  $Y$ , that contains the predicted states of  $d$  traits from an  $m \times 1$  input vector,  $X$ , that contains the genotypes of  $m$  SNPs. MTL LINA can be expressed as:

$$Y = S(\mathbf{K} \cdot (A \circ X) + B),$$

$$A = F(X),$$

where  $S(\cdot)$  is an activation function to be applied element-wise to its input column vector,  $\mathbf{K}$  is a  $d \times m$  coefficient matrix,  $A$  is a  $m \times 1$  attention vector,  $B$  is a  $d \times 1$  bias vector,  $\cdot$  represents the matrix-vector multiplication, and  $\circ$  represents the element-wise multiplication. For the binary classification phenotypes where  $S(\cdot)$  is the sigmoid function, we define the  $d \times 1$  vector *Logit* as:

$$\text{Logit} = \mathbf{K} \cdot (A \circ X) + B$$

For any phenotype  $p$  we have:

$$\text{Logit}_p = K_p^T (A \circ X) + b_p$$

where  $K_p$  is the coefficient vector specific to phenotype  $p$  and  $b_p$  is the bias specific to phenotype  $p$ .

MTL LINA provides the first-order interpretation for phenotype  $p$ . For each phenotype, the gradient of the output logit,  $\text{Logit}_p$ , w.r.t the input feature  $X$ , is defined as the first-order importance score. The logit is used for the importance score computation because it produces more accurate results [1]. For phenotype  $p$ , the output gradient for feature  $x_i \in X$  can be decomposed as follows:

$$\frac{\partial \text{Logit}_p}{\partial x_i} = k_{p,i} a_i + \sum_{j=1}^m k_{p,j} \frac{\partial a_j}{\partial x_i} x_j$$

where  $k_{p,i} \in \mathbf{K}$ ,  $x_j \in X$ , and  $(a_i, a_j) \in A^2$ .

$\frac{\partial \text{Logit}_p}{\partial x_i}$  is the instance-wise first-order importance score of feature  $x_i$  for phenotype  $p$ .

The model-wise first-order importance score is derived as such:

$$FP_{p,i} = \overline{\left| \frac{\partial \text{Logit}_p}{\partial x_i} \right|}$$

Where  $| \cdot |$  represents the absolute value operator and  $\overline{\cdot}$  represents the mean operator.

MTL LINA provides the second-order interpretation for phenotype  $p$ . It is based on the second-order derivative for an attention neural network using the ReLU/Leaky-ReLU activation function in the hidden layers and the linear activation function in the attention layer. The second-order importance score between feature  $x_i$  and feature  $x_j$  for phenotype  $p$  is expressed as:

$$\frac{\partial^2 \text{Logit}_p}{\partial x_i \partial x_j} = k_{p,j} \frac{\partial a_j}{\partial x_i} + k_{p,i} \frac{\partial a_i}{\partial x_j}$$

where  $(k_{p,i}, k_{p,j}) \in \mathbf{K}^2$ ,  $(x_i, x_j) \in X^2$ , and  $(a_i, a_j) \in A^2$ .

The instance-wise second-order importance score for a feature pair  $(x_i, x_j)$  w.r.t. a phenotype  $p$  is defined as their second-order derivative. The model-wise second-order importance score is defined as:

$$SP_{p,i,j} = \overline{\left| \frac{\partial^2 \text{Logit}_p}{\partial x_i \partial x_j} \right|}$$

Here, we demonstrate that the second-order derivative, under the condition of ReLU/Leaky-ReLU as the activation function in the hidden layers, can be derived as:

$$\frac{\partial^2 \text{Logit}_p}{\partial x_i \partial x_j} = k_{p,j} \frac{\partial a_j}{\partial x_i} + k_{p,i} \frac{\partial a_i}{\partial x_j}$$

where  $(k_{p,i}, k_{p,j}) \in \mathbf{K}^2$ ,  $(x_i, x_j) \in X^2$ , and  $(a_i, a_j) \in A^2$ .

**Proof:**

$$\frac{\partial^2 \text{Logit}_p}{\partial x_i \partial x_j} = K_p \begin{bmatrix} x_1 \frac{\partial^2 a_1}{\partial x_i \partial x_j} \\ \vdots \\ x_{i-1} \frac{\partial^2 a_{i-1}}{\partial x_i \partial x_j} \\ x_i \frac{\partial^2 a_i}{\partial x_i \partial x_j} + \frac{\partial a_i}{\partial x_j} \\ x_{i+1} \frac{\partial^2 a_{i+1}}{\partial x_i \partial x_j} \\ \vdots \\ x_{j-1} \frac{\partial^2 a_{j-1}}{\partial x_i \partial x_j} \\ x_j \frac{\partial^2 a_j}{\partial x_i \partial x_j} + \frac{\partial a_j}{\partial x_i} \\ x_{j+1} \frac{\partial^2 a_{j+1}}{\partial x_i \partial x_j} \\ \vdots \\ x_n \frac{\partial^2 a_n}{\partial x_i \partial x_j} \end{bmatrix}$$

where  $K_p \in \mathbf{K}$  is the coefficient vector for phenotype  $p$ .

We aim to demonstrate that, for any neuron,  $q$ , in the attention layer that outputs  $A$  (i.e.,  $q \in A$ )

$$\frac{\partial^2 a_q}{\partial x_i \partial x_j} = 0 \text{ for any } x_i, x_j.$$

For any neuron  $q \in A$ :

$$a_q = \sum_{k=1}^{m_l} w_{q,k,l} f_{k,l}$$

$$\frac{\partial a_q}{\partial x_j} = \sum_{k=1}^{m_l} w_{q,k,l} \frac{\partial f_{k,l}}{\partial x_j}$$

$$\frac{\partial^2 a_q}{\partial x_i \partial x_j} = \sum_{k=1}^{m_l} w_{q,k,l} \frac{\partial^2 f_{k,l}}{\partial x_i \partial x_j}$$

where  $f_{k,l}$  is the activation function output from neuron  $k$  on hidden layer  $l$  containing  $m_l$  neurons, and  $w_{i,k,l}$  the coefficient of the connection between neuron  $q$  on layer  $A$  and neuron  $k$  on layer  $l$ .

For this proof, we define the activation functions:

$$\text{ReLU}(x) = \begin{cases} x, & \text{if } x > 0 \\ 0, & \text{else} \end{cases}$$

$$\text{and Leaky-ReLU}(x) = \begin{cases} x, & \text{if } x > 0 \\ -\alpha x, & \text{else} \end{cases}, \text{ where } \alpha \text{ is a constant.}$$

**Initial case:**

Let's assume the case where MTL LINA has only one hidden layer.

For any neuron  $q$  on the 1<sup>st</sup> hidden layer, we have:

$$\frac{\partial f_{q,1}}{\partial x_j} = \frac{\partial f_{q,1}}{\partial o_{q,1}} \frac{\partial o_{q,1}}{\partial x_j}$$

With  $o_{q,1}$  being the output of neuron  $q$  before activation.

$$o_{q,1} = \sum_{k=1}^m w_{q,k,1} x_k$$

Because  $w_{q,k,1}$  is independent of  $x_j$ ,

$$\frac{\partial o_{q,1}}{\partial x_j} = \sum_{k=1}^m w_{q,k,1} \frac{\partial x_k}{\partial x_j}$$

Then:

$$\frac{\partial f_{q,1}}{\partial x_j} = \frac{\partial f_{q,1}}{\partial o_{q,1}} \sum_{k=1}^m w_{q,k,1} \frac{\partial x_k}{\partial x_j}$$

$$\frac{\partial f_{q,1}}{\partial x_j} = \frac{\partial f_{q,1}}{\partial o_{q,1}} w_{q,j,1}$$

Then:

$$\frac{\partial^2 f_{q,1}}{\partial x_i \partial x_j} = \frac{\partial}{\partial x_i} \left( \frac{\partial f_{q,1}}{\partial o_{q,1}} w_{q,j,1} \right)$$

$$\frac{\partial^2 f_{q,1}}{\partial x_i \partial x_j} = w_{q,j,1} \frac{\partial}{\partial x_i} \left( \frac{\partial f_{q,1}}{\partial o_{q,1}} \right)$$

When  $f_{q,1}$  is ReLU or leaky-ReLU, then  $\frac{\partial}{\partial x_i} \left( \frac{\partial f_{q,1}}{\partial o_{q,1}} \right) = 0$  because for ReLU:  $\frac{\partial f_{q,1}}{\partial o_{q,1}} = \begin{cases} 1, & \text{if } f_{q,1} > 0 \\ 0, & \text{else} \end{cases}$  or Leaky-ReLU:  $\frac{\partial f_{q,1}}{\partial o_{q,1}} = \begin{cases} 1, & \text{if } f_{q,1} > 0 \\ -\alpha, & \text{else} \end{cases}$  and so the second-order derivative of those functions is assumed to be 0 everywhere. Thus:

$$\frac{\partial^2 f_{q,1}}{\partial x_i \partial x_j} = 0$$

And:

$$\frac{\partial^2 a_q}{\partial x_i \partial x_j} = \sum_{k=1}^{m_1} w_{q,k,1} \frac{\partial^2 f_{k,1}}{\partial x_i \partial x_j} = 0$$

### Induction:

We hypothesize that, for a neural network with 2 or more hidden layers, we have at layer  $l$ , for any neuron  $q$ :

$$\frac{\partial^2 f_{q,l}}{\partial x_i \partial x_j} = 0$$

On the next hidden layer  $l + 1$ , we have, for any neuron  $q$ :

$$\frac{\partial f_{q,l+1}}{\partial x_j} = \frac{\partial f_{q,l+1}}{\partial o_{q,l+1}} \frac{\partial o_{q,l+1}}{\partial x_j}$$

And:

$$o_{q,l+1} = \sum_{k=1}^{m_l} w_{q,k,l} f_{k,l}$$

Because  $w_{q,k,l}$  is independent of  $x_j$ :

$$\frac{\partial o_{q,l+1}}{\partial x_j} = \sum_{k=1}^{m_l} w_{q,k,l} \frac{\partial f_{k,l}}{\partial x_j}$$

Then:

$$\frac{\partial f_{q,l+1}}{\partial x_j} = \frac{\partial f_{q,l+1}}{\partial o_{q,l+1}} \sum_{k=1}^{m_l} w_{q,k,l} \frac{\partial f_{k,l}}{\partial x_j}$$

$$\frac{\partial^2 f_{q,l+1}}{\partial x_i \partial x_j} = \frac{\partial}{\partial x_i} \left( \frac{\partial f_{q,l+1}}{\partial o_{q,l+1}} \sum_{k=1}^{m_l} w_{q,k,l} \frac{\partial f_{k,l}}{\partial x_j} \right)$$

$$\frac{\partial^2 f_{q,l+1}}{\partial x_i \partial x_j} = \frac{\partial f_{q,l+1}}{\partial o_{q,l+1}} \sum_{k=1}^{m_l} w_{q,k,l} \frac{\partial}{\partial x_i} \left( \frac{\partial f_{k,l}}{\partial x_j} \right) + \frac{\partial}{\partial x_i} \left( \frac{\partial f_{q,l+1}}{\partial o_{q,l+1}} \right) \sum_{k=1}^{m_l} w_{q,k,l} \frac{\partial f_{k,l}}{\partial x_j}$$

$\frac{\partial}{\partial x_i} \left( \frac{\partial f_{q,l+1}}{\partial o_{q,l+1}} \right) = 0$  because the second derivative of ReLU or Leaky-ReLU is zero.

Thus,

$$\frac{\partial^2 f_{q,l+1}}{\partial x_i \partial x_j} = \frac{\partial f_{q,l+1}}{\partial o_{q,l+1}} \sum_{k=1}^{m_l} w_{q,k,l} \frac{\partial}{\partial x_i} \left( \frac{\partial f_{k,l}}{\partial x_j} \right)$$

For any neuron  $q$  on  $l$  (hypothesis):

$$\frac{\partial^2 f_{q,l}}{\partial x_i \partial x_j} = 0$$

By deduction:

$$\frac{\partial^2 f_{q,l+1}}{\partial x_i \partial x_j} = \frac{\partial f_{q,l+1}}{\partial o_{q,l+1}} \sum_{k=1}^{m_l} w_{q,k,l} 0$$

$$\frac{\partial^2 f_{q,l+1}}{\partial x_i \partial x_j} = 0$$

## Conclusion:

By induction we have demonstrated that for any neuron  $q$  on any layer  $l$ :

$$\frac{\partial^2 f_{q,l}}{\partial x_i \partial x_j} = \mathbf{0}$$

Therefore,

$$\begin{aligned} \frac{\partial^2 a_q}{\partial x_i \partial x_j} &= \sum_{k=1}^{m_l} w_{q,k,l} \frac{\partial^2 f_{k,l}}{\partial x_i \partial x_j} = \sum_{k=1}^{m_l} w_{q,k,l} \mathbf{0} \\ \frac{\partial^2 a_q}{\partial x_i \partial x_j} &= \mathbf{0} \end{aligned}$$

For any  $a_q \in A$

$$\frac{\partial^2 \text{Logit}_p}{\partial x_i \partial x_j} = K_p^T \begin{bmatrix} 0 \\ \vdots \\ 0 \\ \frac{\partial a_i}{\partial x_j} \\ 0 \\ \vdots \\ 0 \\ \frac{\partial a_j}{\partial x_i} \\ 0 \\ \vdots \\ 0 \end{bmatrix}$$

Hence:

$$\frac{\partial^2 \text{Logit}_p}{\partial x_i \partial x_j} = k_{p,j} \frac{\partial a_j}{\partial x_i} + k_{p,i} \frac{\partial a_i}{\partial x_j}$$

## End-of-proof

## Reference:

[1] K. Simonyan, A. Vedaldi, and A. Zisserman, "Deep Inside Convolutional Networks: Visualising Image Classification Models and Saliency Maps." arXiv, Apr. 19, 2014. doi: 10.48550/arXiv.1312.6034.
